# Supplementary material
Source: MDPI journal article supplement (https://www.mdpi.com/2221-3759/11/3/38)
Supplement: s1 [file s1]

Supplemental Figure S1:

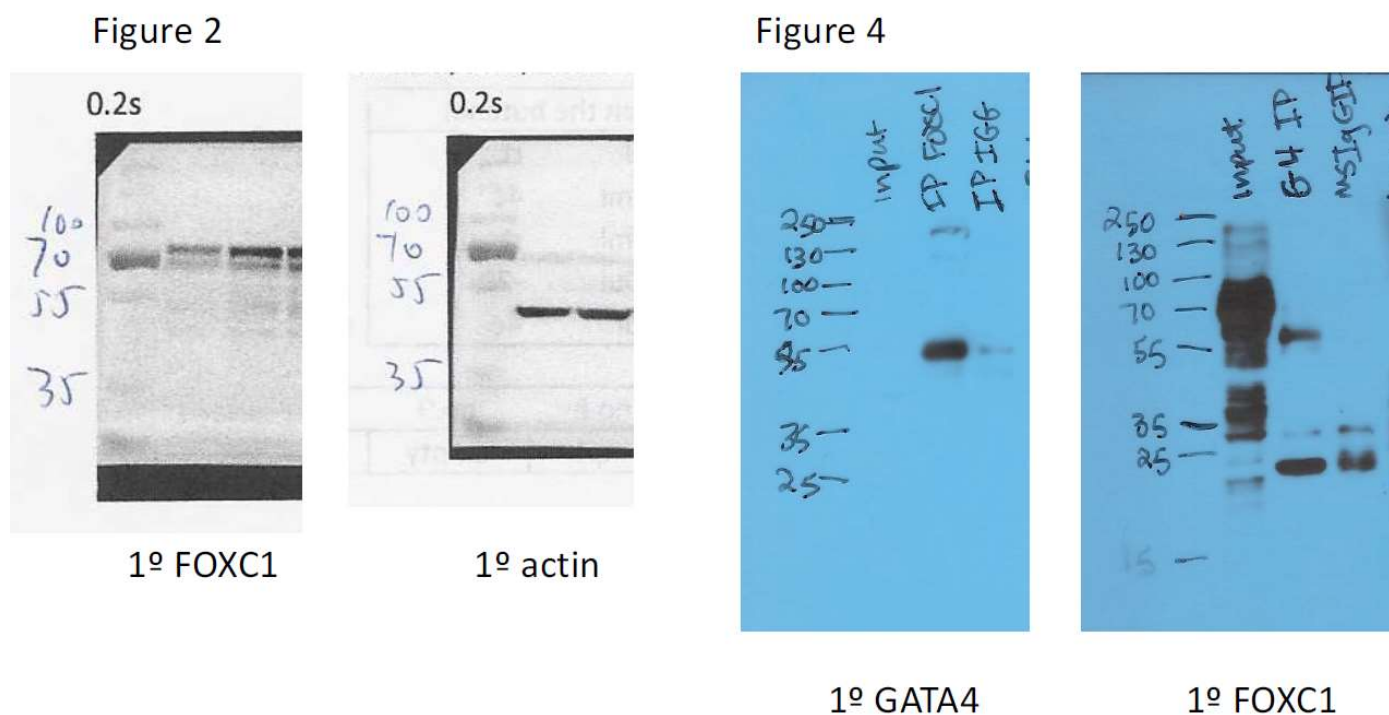

**Figure S1:** Whole immunoblots from Figures 2 and 4.

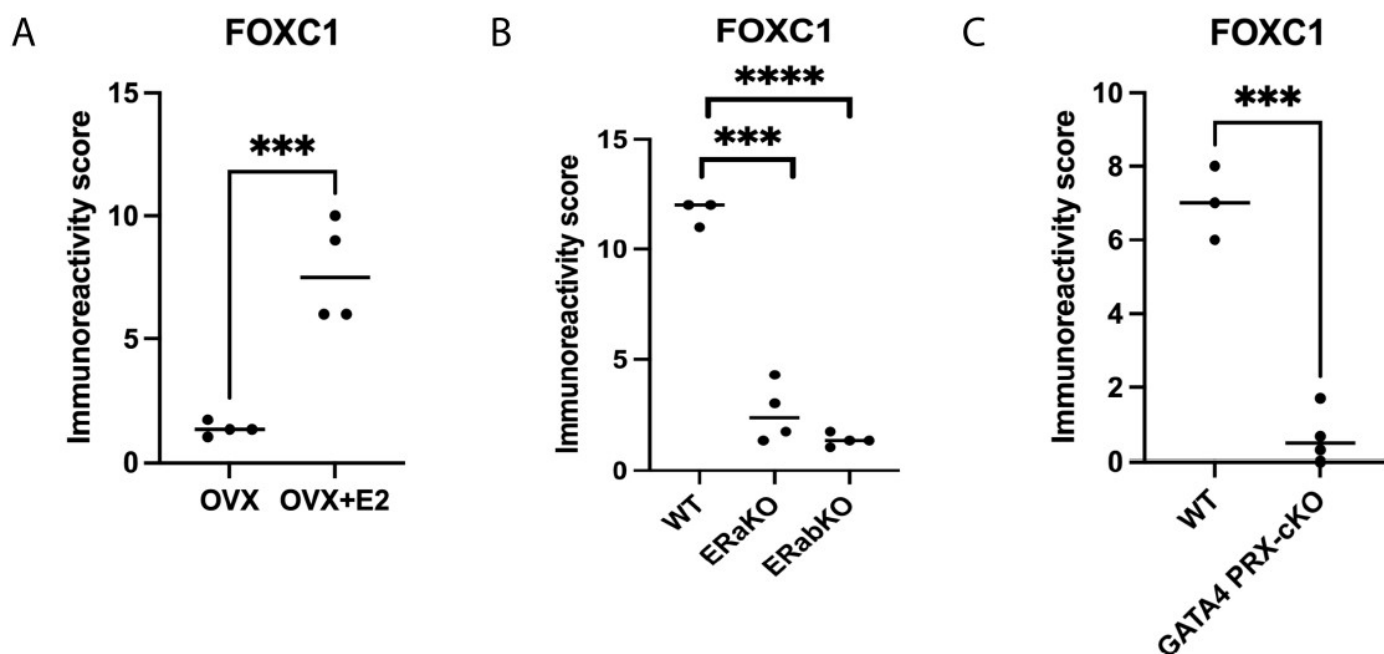

**Supplemental Figure S2:** (A) Immunoreactivity scoring of IHC in Figure 2D. (B) Immunoreactivity scoring of IHC in Figure 2E. (C) Immunoreactivity scoring of IHC in Figure 3.

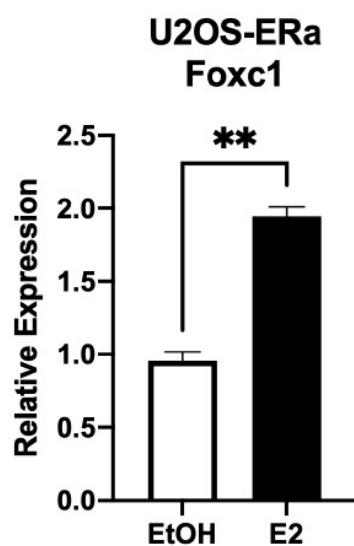

**Supplemental Figure S3: *Foxc1* regulation by E2 in human cells.** U2OS-ER $\alpha$  cells were treated with vehicle control (Ethanol, EtOH) or 10 nM E2 for 24 hours. RNA was obtained and qPCR was performed for *FOXCI* and normalized to *ACTB*.

**Supplemental Table S1.**

| Primers used for ChIP | Sequence                 | Species |
|-----------------------|--------------------------|---------|
| Runx2 prom 1          | CCCCCAAAGTGGGGAGTGGC     | mouse   |
|                       | TGCTTGCTGGGAAAGGGGA      |         |
| Runx2 prom 2          | ACCTTCTGAATGCCAGGAAGGCCT | mouse   |
|                       | TGGGACTGCCTACCACTGTGG    |         |
| Runx2 enh             | TCCTGGACCAGAGCCACGTT     | mouse   |
|                       | GCAACTCCCTGGATGCCCTGG    |         |
| NC                    | GTGGCTGCTCTTCGCTGCCA     | mouse   |
|                       | TGCTGCCACCTGGCCTTTGG     |         |
| Foxc1 A               | ACTGCTGCGAAAGGTCTAGG     | mouse   |
|                       | GAGCAACAGACCACGCAATC     |         |
| Foxc1 B               | AAGCCCCTAGCTGGTTTCAT     | mouse   |
|                       | GGAGTGGGGTGTCTGTCACT     |         |
| Foxc1 C               | TCGCAAGCTGGTCGTAATTC     | mouse   |
|                       | CATACCTAGCCCAGCCTTTGT    |         |
| Foxc1 D               | TCATTACAGGCGTCTCTCG      | mouse   |
|                       | TTTTGAGCATCCGTACCCCA     |         |
| Foxc1 E               | GTGGCATAAACCCCGAGGAA     | mouse   |
|                       | GAGGCCTCTGAAGCCGATAC     |         |
| Foxc1 F               | CACCGTCAAACCTCAAGCAGC    | mouse   |
|                       | TACATGAGGGGCTCTGGGAA     |         |
|                       |                          |         |
|                       |                          |         |
| Primers for cDNA      | Sequence                 | Species |
| Actin (Actb)          | TGGGACTGCCTACCACTGTGG    | mouse   |
|                       | TCCTGGACCAGAGCCACGTT     |         |
| Foxc1                 |                          | mouse   |
|                       |                          |         |
| Actin (ACTB)          | TCCTGGACCAGAGCCACGTT     | human   |
|                       |                          |         |
| FOXC1                 | GTGGCTGCTCTTCGCTGCCA     | human   |
|                       | TGCTGCCACCTGGCCTTTGG     |         |
|                       |                          |         |
|                       |                          |         |
